# Supplementary material for: Knowledge about child birth and postpartum obstetric danger signs and associated factors among mothers in Dale district, Southern Ethiopia
Source: PubMed Central journal article supplement (PMC7268669; doi:10.1186/s12884-020-02989-7), 2020-06-01
Supplement: 12884_2020_2989_MOESM1_ESM.pdf [file 12884_2020_2989_MOESM1_ESM.pdf]

## **ANNEX I: QUESTIONNAIRES**

### **ADAMA SCIENCE AND TECHNOLOGY UNIVERSITY**

#### **SCHOOL OF PUBLIC HEALTH**

The Questionnaire was prepared to assess the level of knowledge about obstetric danger signs of childbirth and post partum among mothers who gave birth in the last 12 months prior to this survey in Dale district, Southern Ethiopia.

#### **HOW TO APPROACH AND INTERVIEW THE HOUSEHOLD**

You will be given the name of the kebele, the village and the house number that is going to be interviewed.

Once you get the household, you should get permission to enter in to the house. Do not enter in to the house without the permission of the household members.

- Introduce yourself by name, and explain the purpose of your visit.
- Tell the household member “Why” and “How” the household was selected for the study.
- Ask whether the eligible woman is present.
- If the eligible woman is there, briefly explain the purpose of the study by reading what was written on the questionnaire, and ask for her consent.
- If the eligible woman is not around, take an appointment for another visit.
- At the end of the interview, tell the respondent that it is the end of the interview, and thank the woman for giving her time and for her cooperation.

**INTRODUCTION AND CONSENT:**

Hello. My Name is \_\_\_\_\_ and I am part of a team of people who are carrying out a survey to assess the level of knowledge about obstetric danger signs of child birth and post partum among mothers who gave birth in the last 12 months prior to this survey in Dale district, (Show a letter of approval from Adama Science and technology university). We were very much appreciate you for your participation in this study. I would like to ask you some questions and it will take about 30 minutes. Your answers will remain confidential, and we will not be taking down your name or address, so your answers will be anonymous.

Participation in this survey is voluntary and you can choose not to answer any individual question or all of the questions. However, we hope that you will participate in this study since your views are important.

At this time, do you want to ask me anything about the study?

Do you agree to participate in this study? Yes ..... No.....

May I begin the interview now? 1. Yes 2. No

If no, go to the next house.

Thank you for your Cooperation.

## IDENTIFICATION

01. Mother's ID number: \_\_\_\_\_

02. Kebele \_\_\_\_\_

## PART I. SOCIO-DEMOGRAPHIC CONDITIONS

| S.No | Questions and filters                 | Answers                                                                                                                    | Remark |
|------|---------------------------------------|----------------------------------------------------------------------------------------------------------------------------|--------|
| 101  | Place of residence                    | 1. Rural<br>2. Urban                                                                                                       |        |
| 102  | Age of the mother?                    | 1. 15-19 years<br>2. 20-24 years<br>3. 25-29 years<br>4. 30-34 years<br>5. $\geq$ 35 years                                 |        |
| 103  | Current marital status of the mother? | 1. Married<br>2. Divorced<br>3. Single<br>4. Widowed                                                                       |        |
| 104  | Religion of mother?                   | 1. Protestant<br>2. Orthodox<br>3. Muslim<br>4. Catholic<br>5. Other(specify)_____                                         |        |
| 105  | Ethnic group of mother?               | 1. Sidama<br>2. Amhara<br>3. Oromo<br>4. Guraghe<br>5. Others(specify)_____                                                |        |
| 106  | Educational level of mother?          | 1. Unable to read and write<br>2. Read and Write<br>3. Primary education<br>4. Secondary education<br>5. College and above |        |

|     |                                                 |                                                                                                                                                                                          |  |
|-----|-------------------------------------------------|------------------------------------------------------------------------------------------------------------------------------------------------------------------------------------------|--|
| 107 | Occupation of the mother?                       | <ol style="list-style-type: none"> <li>1. Housewife</li> <li>2. merchant</li> <li>3. Government employee's</li> <li>4. Private gainful worker</li> <li>5. Other(specify)_____</li> </ol> |  |
| 108 | Monthly income in Ethiopian Birr                | <ol style="list-style-type: none"> <li>1. 100-300</li> <li>2. 301-500</li> <li>3. 500-1000</li> <li>4. &gt;1000</li> </ol>                                                               |  |
| 109 | Age of the husband?                             | <ol style="list-style-type: none"> <li>1. 15-19 years</li> <li>2. 20-24 years</li> <li>3. 25-29 years</li> <li>4. 30-34 years</li> <li>5. <math>\geq</math>35 years</li> </ol>           |  |
| 110 | Educational level of the husband                | <ol style="list-style-type: none"> <li>1. Illiterate</li> <li>2. Read and Write</li> <li>3. primary</li> <li>4. Secondary education</li> <li>5. College and above</li> </ol>             |  |
| 110 | Occupation of the husband?                      | <ol style="list-style-type: none"> <li>1. Farmer</li> <li>2. Merchant</li> <li>3. Government employee</li> <li>4. No job</li> <li>5. Other (specify)_____</li> </ol>                     |  |
| 111 | Monthly income in Ethiopian Birr                | <ol style="list-style-type: none"> <li>1. 100-300</li> <li>2. 301-500</li> <li>3. 500-1000</li> <li>4. &gt;1000</li> </ol>                                                               |  |
| 112 | Family Size                                     | <ol style="list-style-type: none"> <li>1. 1-3</li> <li>2. 4-6</li> <li>3. &gt;6</li> </ol>                                                                                               |  |
| 113 | Do you have Radio/ Television in the household? | <ol style="list-style-type: none"> <li>1. Yes</li> <li>2. No</li> </ol>                                                                                                                  |  |
| 114 | Time taken to nearby health facilities          | <ol style="list-style-type: none"> <li>1. &lt;1 hour</li> <li>2. <math>\geq</math> 1 hour</li> </ol>                                                                                     |  |

## PART II: MATERNAL AND OBSTETRIC CONDITION

| S.No | Questions and filters                                                     | Answers                                                                                                                              | Remark                                                                                            |
|------|---------------------------------------------------------------------------|--------------------------------------------------------------------------------------------------------------------------------------|---------------------------------------------------------------------------------------------------|
| 201  | Age at first pregnancy                                                    | <ol style="list-style-type: none"> <li>1. 15-19 years</li> <li>2. 20-29 years</li> <li>3. 30 and above</li> </ol>                    |                                                                                                   |
| 202  | How many times in total you became pregnant?                              | <ol style="list-style-type: none"> <li>1. 1</li> <li>2. 2 – 3</li> <li>3. 4 and above</li> </ol>                                     |                                                                                                   |
| 203  | How many times in total you gave birth?                                   | <ol style="list-style-type: none"> <li>1. 1</li> <li>2. 2-3</li> <li>3. 4 and above</li> </ol>                                       |                                                                                                   |
| 204  | How many of your pregnancies resulted in a baby that was born Alive?      | <ol style="list-style-type: none"> <li>1. 0</li> <li>2. 1</li> <li>3. 2</li> <li>4. 3 and above</li> </ol>                           |                                                                                                   |
| 205  | How many of your pregnancies resulted in a baby that was born Dead?       | <ol style="list-style-type: none"> <li>1. 0</li> <li>2. 1</li> <li>3. 2</li> <li>4. 3 and above</li> </ol>                           |                                                                                                   |
| 206  | Are you ever-used antenatal care during last pregnancy?                   | <ol style="list-style-type: none"> <li>1. Yes</li> <li>2. No</li> </ol>                                                              |  Skip to 208 |
| 207  | How many times you visit antenatal care during last pregnancy?.           | <ol style="list-style-type: none"> <li>1. 1 visit</li> <li>2. 2-3 visit</li> <li>3. 4 visit</li> <li>4. 4 and above Visit</li> </ol> |                                                                                                   |
| 208  | Where you deliver previous birth?                                         | <ol style="list-style-type: none"> <li>1. Home</li> <li>2. Health institution</li> <li>3. Other specify_____</li> </ol>              |                                                                                                   |
| 209  | Who were final decision maker on place of delivery during last pregnancy? | <ol style="list-style-type: none"> <li>1. Self</li> <li>2. Husband</li> <li>3. Relatives</li> <li>4. Other-----</li> </ol>           |                                                                                                   |

**PART III: KNOWLEDGE**

| S.No | Questions and filters                                                                                                                        | Answers                                                                                                                                                                                                                                                                                                                                              | Remark      |
|------|----------------------------------------------------------------------------------------------------------------------------------------------|------------------------------------------------------------------------------------------------------------------------------------------------------------------------------------------------------------------------------------------------------------------------------------------------------------------------------------------------------|-------------|
| 301  | Do you know any/ some serious health problem/s that can occur during pregnancy that could endanger the life of a pregnant woman?             | 1. Yes<br>2. No <span style="float: right;">—————→</span>                                                                                                                                                                                                                                                                                            | Skip to 303 |
| 302  | Can you mention them?                                                                                                                        | 1. Vaginal bleeding<br>2. Severe headache<br>3. Blurred vision<br>4. Convulsions<br>5. Swollen hands/face.<br>6. High fever<br>7. Loss of consciousness<br>8. pesistant nausea & Vomiting<br>9. Severe weakness<br>10. Severe abdominal pain<br>11. Accelerated/reduced fetal movement<br>12. Water breaks without labor<br>13. Other (Specify)----- |             |
| 303  | Do you know any/some serious health problem/s that can occur during labor and Child birth? That could endanger the life of a pregnant woman? | 1. Yes<br>2. No <span style="float: right;">—————→</span>                                                                                                                                                                                                                                                                                            | Skip to 305 |
| 304  | Can you mention them?                                                                                                                        | 1. Severe vaginal bleeding<br>2. Severe headache<br>3. Convulsions<br>4. High fever<br>5. Loss of consciousness<br>6. Labor lasting >12hours<br>7. Placenta not delivered 30 minutes after delivery<br>8. Other (Specify)_____                                                                                                                       |             |

|     |                                                                                                                                              |                                                                                                                                                                                                                                                                                                                                                                                                  |             |
|-----|----------------------------------------------------------------------------------------------------------------------------------------------|--------------------------------------------------------------------------------------------------------------------------------------------------------------------------------------------------------------------------------------------------------------------------------------------------------------------------------------------------------------------------------------------------|-------------|
| 305 | Do you know any/some serious health problem/s that can occur during the first 42 Days after birth that could endanger the life of the women? | <ol style="list-style-type: none"> <li>1. Yes</li> <li>2. No <span style="font-size: 2em;">→</span></li> </ol>                                                                                                                                                                                                                                                                                   | Skip to 307 |
| 306 | Can you mention them?                                                                                                                        | <ol style="list-style-type: none"> <li>1. Severe vaginal bleeding</li> <li>2. Severe headache</li> <li>3. Blurred vision.</li> <li>4. Convulsions</li> <li>5. Swollen hands/face</li> <li>6. High fever</li> <li>7. Loss of consciousness.</li> <li>8. Difficulty breathing.</li> <li>9. Severe weakness</li> <li>10. Malodorous vaginal discharge</li> <li>11. Others (specify)_____</li> </ol> |             |
| 307 | From where you get information of danger signs                                                                                               | <ol style="list-style-type: none"> <li>1. Antenatal care</li> <li>2. Previous delivery experience</li> <li>3. General awareness in the community</li> <li>4. Health education given at Health facilities</li> <li>5. Heard of mass media(radio/TV)</li> <li>6. Other (specify)-----</li> </ol>                                                                                                   |             |
